# Supplementary material for: Unveiling the reaction mechanism and the regioselectivity of Diels–Alder cycloadditions between 2-methoxy-3-thiophenylbutadiene and methyl vinyl ketone using topological tools
Source: Royal Society of Chemistry journal article supplement (doi:10.1039/d6ra00118a), 2026-03-30
Supplement: d6ra00118a1.pdf [file d6ra00118a1.pdf]

## Unveiling the Reaction Mechanism and the Regioselectivity of Diels-Alder Cycloadditions between 2-methoxy-3-thiophenylbutadiene and methyl vinyl ketone Using Topological Tools

Mohamed Chellegui,<sup>a</sup> Sabir A. Mohammed Salih,<sup>b</sup> Lakhdar Benhamed,<sup>c</sup> Haydar A.

Mohammad-Salim<sup>\*d,e</sup>, Ali Ben Ahmed<sup>f,g</sup>

<sup>a</sup>Namur Institute of Structured Matter, University of Namur, Rue de Bruxelles, 61, Namur, B-5000, Belgium.

<sup>c</sup>Laboratory of Applied Thermodynamics and Molecular Modelling (LAT2M), Department of Chemistry, Faculty of Science, University of Tlemcen, PB 119, Tlemcen, 13000, Algeria.

<sup>d</sup>Department of Chemistry, Faculty of Science, University of Zakho, Zakho, 42002, Kurdistan Region, Iraq.

<sup>e</sup>TCCG Lab, Scientific Research Center, University of Zakho, Zakho, 42002, Kurdistan Region, Iraq.

<sup>f</sup>Laboratory of Applied Physics, Department of Physics, Faculty of Sciences of Sfax, University of Sfax, Sfax, Tunisia.

<sup>g</sup>Department of Biomedical, Higher Institute of Biotechnology of Sfax, University of Sfax, Sfax, Tunisia. E-mail: [ali.benahmed@isbs.usf.tn](mailto:ali.benahmed@isbs.usf.tn).

Table S1 Energies (E, in a.u.), enthalpies (H<sup>0</sup>, in a.u.), Gibbs free energy (G<sup>0</sup>, in a.u.), and Maxwell-Boltzmann weights (P, in %) of the *s-cis* and *s-trans* conformers of methyl vinyl ketone **2** calculated at the IEFPCM(Diethylether)/M06-2X-D3/6-311+G(d,p) level. [ $\Delta X = X(2 \text{ s-cis}) - X(2 \text{ s-trans})$  in kcal mol<sup>-1</sup>, with X = E, H<sup>0</sup>, and G<sup>0</sup>]

|                  | E           | $\Delta E$ | H <sup>0</sup> | $\Delta H^0$ | G <sup>0</sup> | $\Delta G^0$ | P  |
|------------------|-------------|------------|----------------|--------------|----------------|--------------|----|
| <b>2 s-cis</b>   | -231.193539 | 0.07       | -231.096775    | 0.01         | -231.132371    | -0.17        | 57 |
| <b>2 s-trans</b> | -231.193655 |            | -231.096797    |              | -231.132105    |              | 43 |

Table S2 Energies, enthalpies, entropies, and Gibbs enthalpies of reactants, transition states, and products calculated at the DFT level using the M06-2X-D3/6-311+G(d,p) (T = 298.15K and P = 1 atm). Solvent (Diethylether) effects were described using IEFPCM

|                                                    | E (u.a.)     | H (u.a.)     | G (u.a.)     | S (cal mol <sup>-1</sup> K <sup>-1</sup> ) |
|----------------------------------------------------|--------------|--------------|--------------|--------------------------------------------|
| <b>In vacuo</b>                                    |              |              |              |                                            |
| <b>1</b>                                           | -899.651864  | -899.435937  | -899.490616  | 115.082                                    |
| <b>2</b>                                           | -231.189354  | -231.092389  | -231.127594  | 74.095                                     |
| <b>TS-on</b>                                       | -1130.827118 | -1130.512558 | -1130.578215 | 138.185                                    |
| <b>TS-ox</b>                                       | -1130.821348 | -1130.507001 | -1130.574670 | 142.422                                    |
| <b>TS-mn</b>                                       | -1130.825675 | -1130.511104 | -1130.576325 | 137.269                                    |
| <b>TS-mx</b>                                       | -1130.820219 | -1130.505877 | -1130.573499 | 142.322                                    |
| <b>CA-on</b>                                       | -1130.912259 | -1130.592851 | -1130.659746 | 140.793                                    |
| <b>CA-ox</b>                                       | -1130.908606 | -1130.589312 | -1130.656809 | 142.059                                    |
| <b>CA-mn</b>                                       | -1130.919119 | -1130.600087 | -1130.667829 | 142.575                                    |
| <b>CA-mx</b>                                       | -1130.908737 | -1130.589426 | -1130.657267 | 142.784                                    |
| <b>Diethylether (<math>\epsilon = 4.33</math>)</b> |              |              |              |                                            |

|              |              |              |              |         |
|--------------|--------------|--------------|--------------|---------|
| <b>1</b>     | -899.656647  | -899.440852  | -899.495360  | 114.720 |
| <b>2</b>     | -231.193655  | -231.096797  | -231.132105  | 74.313  |
| <b>TS-on</b> | -1130.835679 | -1130.521275 | -1130.586926 | 138.174 |
| <b>TS-ox</b> | -1130.830436 | -1130.516261 | -1130.583872 | 142.299 |
| <b>TS-mn</b> | -1130.834556 | -1130.520129 | -1130.585748 | 138.108 |
| <b>TS-mx</b> | -1130.829940 | -1130.515796 | -1130.583394 | 142.273 |
| <b>CA-on</b> | -1130.920256 | -1130.600958 | -1130.667673 | 140.414 |
| <b>CA-ox</b> | -1130.916766 | -1130.597416 | -1130.664940 | 142.115 |
| <b>CA-mn</b> | -1130.918526 | -1130.599290 | -1130.667741 | 144.067 |
| <b>CA-mx</b> | -1130.916997 | -1130.597658 | -1130.666161 | 144.177 |

Table S3 M06-2X-D3/6-311+G(d,p) local reactivity descriptors namely the nucleophilic and electrophilic indices ( $N_k$ ,  $\omega_k$ ), and Local reactivity difference index ( $R_k$ ), in eV. k corresponds to each of the two reactive centers of **1** and **2**, in *vacuo*

| Reactants | k  | $P_k^-$ | $N_k$ | $P_k^+$ | $\omega_k$ | $R_k$ |
|-----------|----|---------|-------|---------|------------|-------|
| <b>1</b>  | C1 | 0.008   | 0.02  | 0.17    | 0.15       | 0.13  |
|           | C2 | 0.006   | 0.01  | 0.02    | 0.02       | 0.01  |
|           | C3 | -0.03   | -0.06 | 0.20    | 0.18       | 0.24  |
|           | C4 | 0.08    | 0.17  | 0.60    | 0.54       | 0.37  |
| <b>2</b>  | C5 | -0.04   | -0.02 | 0.50    | 0.70       | 0.72  |
|           | C6 | 0.14    | 0.04  | 0.05    | 0.07       | 0.03  |

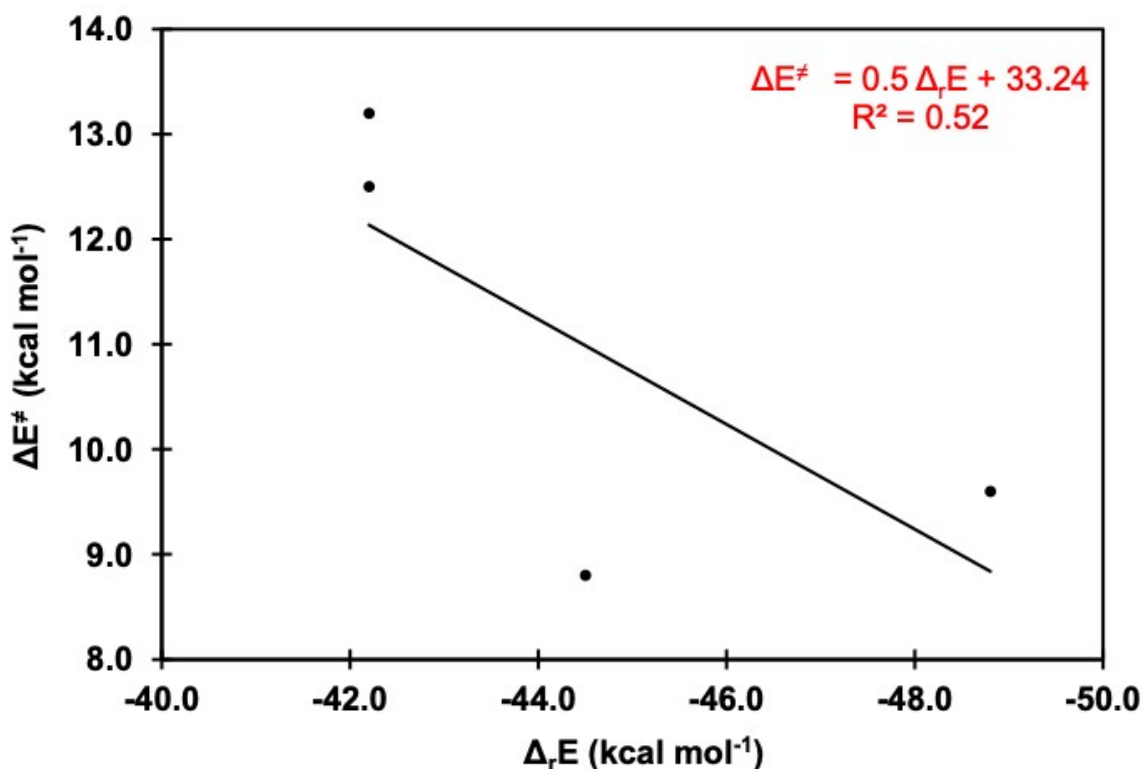

Fig. S1 Activation energy ( $\Delta E^\ddagger$ , in kcal mol<sup>-1</sup>) versus the energy reaction ( $\Delta_r E$ , in kcal mol<sup>-1</sup>) as evaluated at the M06-2X-D3/6-311+G(d,p) level, in *vacuo*.

**Cartesian Coordinates of all the Stationary Points as Computed at the M06-2X-D3/6-311+G(d,p) level in *vacuo***

**1**

0 1

|   |               |               |               |
|---|---------------|---------------|---------------|
| C | -3.6331640000 | -0.5526550000 | 0.4531470000  |
| H | -3.7750750000 | -1.5718660000 | 0.7802660000  |
| H | -4.5078210000 | 0.0710840000  | 0.3372430000  |
| C | -2.3937140000 | -0.1252090000 | 0.1943610000  |
| C | -1.1983170000 | -0.9829300000 | 0.3885460000  |
| C | -0.9699730000 | -1.6321770000 | 1.5262060000  |
| H | -1.6293020000 | -1.4967300000 | 2.3764080000  |
| H | -0.1122240000 | -2.2845710000 | 1.6355730000  |
| S | -0.0761450000 | -1.1212990000 | -1.0054410000 |
| C | 1.3719910000  | -0.2916240000 | -0.3696580000 |
| C | 2.6202740000  | -0.8596280000 | -0.6122890000 |
| C | 1.2764070000  | 0.9271550000  | 0.3030520000  |
| C | 3.7729830000  | -0.2066890000 | -0.1856210000 |
| H | 2.6863010000  | -1.8118220000 | -1.1251990000 |
| C | 2.4305810000  | 1.5588100000  | 0.7450430000  |
| H | 0.3005560000  | 1.3677240000  | 0.4700600000  |
| C | 3.6817850000  | 0.9985160000  | 0.4988300000  |
| H | 4.7418340000  | -0.6521710000 | -0.3777980000 |
| H | 2.3532720000  | 2.5016380000  | 1.2736690000  |
| H | 4.5792390000  | 1.5002330000  | 0.8396310000  |
| O | -2.0518650000 | 1.1004340000  | -0.2687590000 |
| C | -3.1086380000 | 1.9790800000  | -0.5951340000 |
| H | -3.6920300000 | 2.2369710000  | 0.2942480000  |
| H | -2.6459300000 | 2.8743000000  | -1.0030210000 |
| H | -3.7668810000 | 1.5266290000  | -1.3428580000 |

**2**

0 1

|   |               |               |               |
|---|---------------|---------------|---------------|
| C | 1.9240280000  | 0.1691430000  | 0.0000000000  |
| H | 1.8143740000  | 1.2482210000  | 0.0000000000  |
| H | 2.9358680000  | -0.2180130000 | 0.0000000000  |
| C | 0.8732060000  | -0.6444520000 | 0.0000000000  |
| H | 0.9894350000  | -1.7233780000 | 0.0000000000  |
| C | -0.5478480000 | -0.1899930000 | 0.0000000000  |
| O | -1.4352860000 | -1.0086750000 | 0.0000000000  |
| C | -0.8381160000 | 1.2957960000  | 0.0000000000  |
| H | -0.4043310000 | 1.7713560000  | 0.8824870000  |
| H | -0.4042770000 | 1.7713910000  | -0.8824500000 |
| H | -1.9163990000 | 1.4368640000  | 0.0000000000  |

**CA-ox**

0 1

|   |               |               |              |
|---|---------------|---------------|--------------|
| C | -2.2740200000 | 0.3879700000  | 0.7603370000 |
| H | -2.0656260000 | -0.3548680000 | 1.5409630000 |

|   |               |               |               |
|---|---------------|---------------|---------------|
| H | -3.0550440000 | 1.0419060000  | 1.1511900000  |
| C | -1.0109560000 | 1.1663630000  | 0.4960570000  |
| C | -0.0209940000 | 0.5657960000  | -0.1721590000 |
| C | -0.2555050000 | -0.8583580000 | -0.6157450000 |
| H | -0.2372760000 | -1.5269130000 | 0.2537170000  |
| H | 0.5447000000  | -1.1870980000 | -1.2798530000 |
| S | 1.4422890000  | 1.4387460000  | -0.6499510000 |
| C | 2.6799640000  | 0.2506610000  | -0.1620990000 |
| C | 3.7592410000  | 0.0117690000  | -1.0105170000 |
| C | 2.6019170000  | -0.4076460000 | 1.0655370000  |
| C | 4.7583590000  | -0.8773170000 | -0.6279750000 |
| H | 3.8091960000  | 0.5164400000  | -1.9681690000 |
| C | 3.5908830000  | -1.3117910000 | 1.4298350000  |
| H | 1.7690320000  | -0.2011070000 | 1.7285020000  |
| C | 4.6741380000  | -1.5463570000 | 0.5874160000  |
| H | 5.5968840000  | -1.0563890000 | -1.2903820000 |
| H | 3.5227040000  | -1.8243350000 | 2.3821230000  |
| H | 5.4476240000  | -2.2465450000 | 0.8781290000  |
| O | -0.9227430000 | 2.4353850000  | 0.9856850000  |
| C | -1.6873440000 | 3.3835840000  | 0.2555000000  |
| H | -2.7458030000 | 3.1034680000  | 0.2203130000  |
| H | -1.5852180000 | 4.3348890000  | 0.7732890000  |
| H | -1.3037570000 | 3.4761770000  | -0.7653890000 |
| C | -1.6153160000 | -0.9567750000 | -1.3301320000 |
| H | -1.8258110000 | -2.0010900000 | -1.5745100000 |
| H | -1.5305180000 | -0.4257320000 | -2.2798570000 |
| C | -2.7771170000 | -0.3324170000 | -0.5186450000 |
| H | -3.2999100000 | 0.4072940000  | -1.1271770000 |
| C | -3.8418300000 | -1.3275070000 | -0.0801630000 |
| O | -5.0108370000 | -1.0406900000 | -0.1156500000 |
| C | -3.3817340000 | -2.6763270000 | 0.4442100000  |
| H | -3.3936570000 | -3.3942240000 | -0.3805460000 |
| H | -2.3683140000 | -2.6483900000 | 0.8476400000  |
| H | -4.0853110000 | -3.0208650000 | 1.2002040000  |

**CA-on**

0 1

|   |               |               |               |
|---|---------------|---------------|---------------|
| C | 2.2349670000  | 0.4072440000  | -1.2425760000 |
| H | 1.8363570000  | 0.3855910000  | -2.2621470000 |
| H | 3.1025510000  | 1.0720900000  | -1.2522600000 |
| C | 1.1921190000  | 0.9348170000  | -0.2923490000 |
| C | 0.1468280000  | 0.1596630000  | 0.0081700000  |
| C | 0.1110000000  | -1.2176570000 | -0.6078310000 |
| H | -0.1065450000 | -1.1442730000 | -1.6796420000 |
| H | -0.6857240000 | -1.8163920000 | -0.1648100000 |
| S | -1.0226100000 | 0.6567540000  | 1.2416130000  |
| C | -2.5342680000 | 0.0994170000  | 0.4778850000  |
| C | -3.4992800000 | -0.5199190000 | 1.2697630000  |
| C | -2.7843310000 | 0.3156440000  | -0.8777960000 |
| C | -4.7093710000 | -0.9140880000 | 0.7084060000  |

|   |               |               |               |
|---|---------------|---------------|---------------|
| H | -3.2961550000 | -0.6975270000 | 2.3192420000  |
| C | -3.9848060000 | -0.1023280000 | -1.4365660000 |
| H | -2.0357470000 | 0.8116440000  | -1.4859320000 |
| C | -4.9531920000 | -0.7136130000 | -0.6451440000 |
| H | -5.4564620000 | -1.3923770000 | 1.3304900000  |
| H | -4.1700400000 | 0.0618050000  | -2.4915180000 |
| H | -5.8914600000 | -1.0320400000 | -1.0824750000 |
| O | 1.4074250000  | 2.1408610000  | 0.3156680000  |
| C | 1.2713180000  | 3.2500440000  | -0.5622720000 |
| H | 0.2435140000  | 3.3152180000  | -0.9317650000 |
| H | 1.5102480000  | 4.1398100000  | 0.0161040000  |
| H | 1.9604210000  | 3.1728610000  | -1.4098790000 |
| C | 1.4719450000  | -1.9061940000 | -0.4002400000 |
| H | 1.4895550000  | -2.8635340000 | -0.9233290000 |
| H | 1.5673550000  | -2.1322190000 | 0.6653830000  |
| C | 2.6680400000  | -1.0361540000 | -0.8704210000 |
| H | 3.1339640000  | -1.4932670000 | -1.7443150000 |
| C | 3.7569610000  | -1.0230110000 | 0.1996780000  |
| O | 4.7762270000  | -1.6464200000 | 0.0423770000  |
| C | 3.5071590000  | -0.2092290000 | 1.4532550000  |
| H | 4.3259140000  | -0.3766610000 | 2.1496230000  |
| H | 3.4394030000  | 0.8543960000  | 1.2084440000  |
| H | 2.5548550000  | -0.4765290000 | 1.9168480000  |

#### CA-mn

0 1

|   |               |               |               |
|---|---------------|---------------|---------------|
| C | -3.0290450000 | 0.0395590000  | 0.0258800000  |
| H | -3.0988140000 | -0.2985550000 | 1.0616090000  |
| H | -3.9454000000 | 0.5958340000  | -0.1990810000 |
| C | -1.8668650000 | 0.9899850000  | -0.0825990000 |
| C | -0.7642220000 | 0.7272040000  | -0.7968330000 |
| C | -0.6051560000 | -0.5347120000 | -1.6081770000 |
| H | 0.4487310000  | -0.8229810000 | -1.6181000000 |
| H | -0.8782440000 | -0.3390410000 | -2.6507040000 |
| S | 0.5563310000  | 1.9124080000  | -0.8898950000 |
| C | 1.8788660000  | 0.9191600000  | -0.2163520000 |
| C | 3.1538530000  | 1.0292900000  | -0.7707310000 |
| C | 1.6698470000  | 0.0700250000  | 0.8720320000  |
| C | 4.2113730000  | 0.3022580000  | -0.2351340000 |
| H | 3.3106810000  | 1.6785510000  | -1.6242530000 |
| C | 2.7281580000  | -0.6681740000 | 1.3888200000  |
| H | 0.6805280000  | -0.0102990000 | 1.3100620000  |
| C | 4.0023140000  | -0.5534690000 | 0.8410170000  |
| H | 5.1990410000  | 0.3961210000  | -0.6709790000 |
| H | 2.5548390000  | -1.3267640000 | 2.2322900000  |
| H | 4.8257040000  | -1.1258110000 | 1.2504090000  |
| O | -1.9913120000 | 2.1883690000  | 0.5493220000  |
| C | -2.5576470000 | 2.1663040000  | 1.8503360000  |
| H | -2.0324090000 | 1.4535000000  | 2.4935490000  |
| H | -2.4316660000 | 3.1712360000  | 2.2466650000  |

|   |               |               |               |
|---|---------------|---------------|---------------|
| H | -3.6228070000 | 1.9205670000  | 1.8266420000  |
| C | -2.9176050000 | -1.1786130000 | -0.8978760000 |
| H | -3.2896240000 | -0.9136440000 | -1.8918150000 |
| H | -3.5539090000 | -1.9792700000 | -0.5153350000 |
| C | -1.4811790000 | -1.6771290000 | -1.0640970000 |
| H | -1.4587340000 | -2.4922450000 | -1.7962110000 |
| C | -0.8829030000 | -2.2240730000 | 0.2278350000  |
| O | -1.3678700000 | -1.9934900000 | 1.3095370000  |
| C | 0.3486620000  | -3.0935330000 | 0.0913770000  |
| H | 0.0718430000  | -4.0254170000 | -0.4102680000 |
| H | 1.1185210000  | -2.6074960000 | -0.5107630000 |
| H | 0.7431580000  | -3.3163330000 | 1.0807360000  |

**CA-mx**

0 1

|   |               |               |               |
|---|---------------|---------------|---------------|
| C | -2.2960000000 | 1.5008890000  | 0.8983820000  |
| H | -2.1962610000 | 1.3890650000  | 1.9844820000  |
| H | -2.8901570000 | 2.4068220000  | 0.7406450000  |
| C | -0.9198170000 | 1.7246430000  | 0.3315330000  |
| C | -0.2815340000 | 0.8237330000  | -0.4233920000 |
| C | -0.8560160000 | -0.5340560000 | -0.7359210000 |
| H | -0.0679350000 | -1.2875640000 | -0.6494590000 |
| H | -1.1888800000 | -0.5701070000 | -1.7778260000 |
| S | 1.2996360000  | 1.2141020000  | -1.1444890000 |
| C | 2.3114190000  | 0.0088850000  | -0.2974990000 |
| C | 3.2021910000  | -0.7721900000 | -1.0294490000 |
| C | 2.2375300000  | -0.1286690000 | 1.0885660000  |
| C | 4.0221270000  | -1.6851200000 | -0.3733500000 |
| H | 3.2422600000  | -0.6700710000 | -2.1073420000 |
| C | 3.0433840000  | -1.0575660000 | 1.7336270000  |
| H | 1.5533780000  | 0.4994070000  | 1.6482530000  |
| C | 3.9404230000  | -1.8349840000 | 1.0058330000  |
| H | 4.7143630000  | -2.2905710000 | -0.9462020000 |
| H | 2.9806590000  | -1.1653320000 | 2.8100690000  |
| H | 4.5720190000  | -2.5542240000 | 1.5128450000  |
| O | -0.3490920000 | 2.9088280000  | 0.7172930000  |
| C | -0.5612920000 | 3.9839480000  | -0.1850480000 |
| H | -1.6297630000 | 4.1360940000  | -0.3739210000 |
| H | -0.1487210000 | 4.8742350000  | 0.2856910000  |
| H | -0.0460490000 | 3.7993190000  | -1.1318550000 |
| C | -2.9951740000 | 0.2869630000  | 0.2909910000  |
| H | -3.3485670000 | 0.5294910000  | -0.7171540000 |
| H | -3.8697600000 | 0.0273300000  | 0.8915180000  |
| C | -2.0144920000 | -0.8914450000 | 0.1895000000  |
| H | -1.6252250000 | -1.0863350000 | 1.1993920000  |
| C | -2.7150300000 | -2.1652910000 | -0.2631120000 |
| O | -2.3826370000 | -2.7541810000 | -1.2597520000 |
| C | -3.8675690000 | -2.6571140000 | 0.5902470000  |
| H | -3.7093850000 | -2.4473350000 | 1.6495720000  |
| H | -4.7824040000 | -2.1439430000 | 0.2804660000  |

|   |               |               |              |
|---|---------------|---------------|--------------|
| H | -4.0008170000 | -3.7248360000 | 0.4268820000 |
|---|---------------|---------------|--------------|

**TS-ox**

0 1

|   |               |               |               |
|---|---------------|---------------|---------------|
| C | -2.4066090000 | 0.7025350000  | 0.8727990000  |
| H | -2.3573450000 | -0.1294560000 | 1.5562470000  |
| H | -3.3789390000 | 1.1639560000  | 0.7704740000  |
| C | -1.2538310000 | 1.3430690000  | 0.5008950000  |
| C | -0.0174680000 | 0.6450740000  | 0.4492560000  |
| C | 0.0212560000  | -0.7076220000 | 0.7391340000  |
| H | -0.6244270000 | -1.0862010000 | 1.5209270000  |
| H | 0.9546590000  | -1.2467460000 | 0.6325190000  |
| S | 1.2629220000  | 1.4796450000  | -0.4630740000 |
| C | 2.6369100000  | 0.3720590000  | -0.2005720000 |
| C | 3.0716610000  | -0.4507920000 | -1.2367860000 |
| C | 3.2972420000  | 0.3541880000  | 1.0284270000  |
| C | 4.1628080000  | -1.2935620000 | -1.0424870000 |
| H | 2.5540510000  | -0.4272270000 | -2.1884180000 |
| C | 4.3774820000  | -0.4968170000 | 1.2210140000  |
| H | 2.9539510000  | 1.0049860000  | 1.8238560000  |
| C | 4.8125300000  | -1.3203170000 | 0.1854610000  |
| H | 4.5006540000  | -1.9303840000 | -1.8511590000 |
| H | 4.8868660000  | -0.5113610000 | 2.1770910000  |
| H | 5.6593820000  | -1.9787470000 | 0.3365730000  |
| O | -1.2232250000 | 2.5634010000  | -0.0994030000 |
| C | -2.4274850000 | 3.2995060000  | -0.1542540000 |
| H | -2.8447340000 | 3.4402410000  | 0.8476220000  |
| H | -2.1707500000 | 4.2642560000  | -0.5847330000 |
| H | -3.1664120000 | 2.8018030000  | -0.7894290000 |
| C | -1.1353270000 | -1.5645810000 | -0.7643080000 |
| H | -1.0236360000 | -2.5595240000 | -0.3465950000 |
| H | -0.4292720000 | -1.3220900000 | -1.5500500000 |
| C | -2.3996690000 | -0.9899920000 | -0.8126160000 |
| H | -2.6229930000 | -0.2273540000 | -1.5485860000 |
| C | -3.5980710000 | -1.5988000000 | -0.2041370000 |
| O | -4.7118140000 | -1.1915820000 | -0.4573760000 |
| C | -3.4002810000 | -2.7543900000 | 0.7638500000  |
| H | -4.3370520000 | -2.9300550000 | 1.2882650000  |
| H | -3.1261960000 | -3.6570690000 | 0.2118480000  |
| H | -2.6011370000 | -2.5552270000 | 1.4828970000  |

**TS-on**

0 1

|   |               |               |              |
|---|---------------|---------------|--------------|
| C | -2.3663770000 | 0.4885320000  | 1.5405190000 |
| H | -2.0379200000 | 0.0342000000  | 2.4598930000 |
| H | -3.4207450000 | 0.7191510000  | 1.4798780000 |
| C | -1.4481710000 | 1.0758310000  | 0.7075460000 |
| C | -0.1078240000 | 0.6092550000  | 0.6642910000 |
| C | 0.2656260000  | -0.4775430000 | 1.4367380000 |
| H | -0.1669260000 | -0.5828170000 | 2.4223620000 |

|   |               |               |               |
|---|---------------|---------------|---------------|
| H | 1.2698620000  | -0.8731880000 | 1.3466770000  |
| S | 0.8364320000  | 1.1893790000  | -0.7332950000 |
| C | 2.4201060000  | 0.4371840000  | -0.4026530000 |
| C | 2.8122120000  | -0.6936790000 | -1.1153260000 |
| C | 3.2761950000  | 0.9952500000  | 0.5469300000  |
| C | 4.0566610000  | -1.2689220000 | -0.8741090000 |
| H | 2.1412360000  | -1.1167100000 | -1.8536440000 |
| C | 4.5127850000  | 0.4117270000  | 0.7911090000  |
| H | 2.9623690000  | 1.8791000000  | 1.0894710000  |
| C | 4.9045200000  | -0.7198760000 | 0.0804680000  |
| H | 4.3600690000  | -2.1470920000 | -1.4312090000 |
| H | 5.1752070000  | 0.8448760000  | 1.5308790000  |
| H | 5.8716940000  | -1.1698540000 | 0.2692050000  |
| O | -1.7740640000 | 1.9179620000  | -0.3115250000 |
| C | -3.1365700000 | 2.2709900000  | -0.4601020000 |
| H | -3.5077240000 | 2.7772180000  | 0.4363580000  |
| H | -3.1780950000 | 2.9504740000  | -1.3076900000 |
| H | -3.7519780000 | 1.3882160000  | -0.6631000000 |
| C | -0.8870510000 | -2.0524740000 | 0.6983190000  |
| H | -0.4681000000 | -2.7457040000 | 1.4186720000  |
| H | -0.4038270000 | -2.0631750000 | -0.2724300000 |
| C | -2.2422640000 | -1.7568220000 | 0.7836080000  |
| H | -2.8170020000 | -2.0869290000 | 1.6420910000  |
| C | -3.0755740000 | -1.3744610000 | -0.3766640000 |
| O | -4.2867870000 | -1.3308030000 | -0.2965650000 |
| C | -2.3712800000 | -1.0452390000 | -1.6792080000 |
| H | -3.0979490000 | -0.6203640000 | -2.3693630000 |
| H | -1.5404470000 | -0.3514450000 | -1.5343170000 |
| H | -1.9637860000 | -1.9618160000 | -2.1151080000 |

**TS-mn**

0 1

|   |               |               |               |
|---|---------------|---------------|---------------|
| C | -2.3663770000 | 0.4885320000  | 1.5405190000  |
| H | -2.0379200000 | 0.0342000000  | 2.4598930000  |
| H | -3.4207450000 | 0.7191510000  | 1.4798780000  |
| C | -1.4481710000 | 1.0758310000  | 0.7075460000  |
| C | -0.1078240000 | 0.6092550000  | 0.6642910000  |
| C | 0.2656260000  | -0.4775430000 | 1.4367380000  |
| H | -0.1669260000 | -0.5828170000 | 2.4223620000  |
| H | 1.2698620000  | -0.8731880000 | 1.3466770000  |
| S | 0.8364320000  | 1.1893790000  | -0.7332950000 |
| C | 2.4201060000  | 0.4371840000  | -0.4026530000 |
| C | 2.8122120000  | -0.6936790000 | -1.1153260000 |
| C | 3.2761950000  | 0.9952500000  | 0.5469300000  |
| C | 4.0566610000  | -1.2689220000 | -0.8741090000 |
| H | 2.1412360000  | -1.1167100000 | -1.8536440000 |
| C | 4.5127850000  | 0.4117270000  | 0.7911090000  |
| H | 2.9623690000  | 1.8791000000  | 1.0894710000  |
| C | 4.9045200000  | -0.7198760000 | 0.0804680000  |
| H | 4.3600690000  | -2.1470920000 | -1.4312090000 |

|   |               |               |               |
|---|---------------|---------------|---------------|
| H | 5.1752070000  | 0.8448760000  | 1.5308790000  |
| H | 5.8716940000  | -1.1698540000 | 0.2692050000  |
| O | -1.7740640000 | 1.9179620000  | -0.3115250000 |
| C | -3.1365700000 | 2.2709900000  | -0.4601020000 |
| H | -3.5077240000 | 2.7772180000  | 0.4363580000  |
| H | -3.1780950000 | 2.9504740000  | -1.3076900000 |
| H | -3.7519780000 | 1.3882160000  | -0.6631000000 |
| C | -0.8870510000 | -2.0524740000 | 0.6983190000  |
| H | -0.4681000000 | -2.7457040000 | 1.4186720000  |
| H | -0.4038270000 | -2.0631750000 | -0.2724300000 |
| C | -2.2422640000 | -1.7568220000 | 0.7836080000  |
| H | -2.8170020000 | -2.0869290000 | 1.6420910000  |
| C | -3.0755740000 | -1.3744610000 | -0.3766640000 |
| O | -4.2867870000 | -1.3308030000 | -0.2965650000 |
| C | -2.3712800000 | -1.0452390000 | -1.6792080000 |
| H | -3.0979490000 | -0.6203640000 | -2.3693630000 |
| H | -1.5404470000 | -0.3514450000 | -1.5343170000 |
| H | -1.9637860000 | -1.9618160000 | -2.1151080000 |

**TS-mx**

0 1

|   |               |               |               |
|---|---------------|---------------|---------------|
| C | 2.9416390000  | -0.3395440000 | 0.7482310000  |
| H | 2.7623930000  | 0.4169100000  | 1.4961680000  |
| H | 3.9764400000  | -0.6424980000 | 0.6575140000  |
| C | 1.9272690000  | -1.2364340000 | 0.4617640000  |
| C | 0.5706480000  | -0.8236830000 | 0.4834480000  |
| C | 0.2561050000  | 0.4548180000  | 0.8658180000  |
| H | 0.8669640000  | 0.9556620000  | 1.6046340000  |
| H | -0.7455460000 | 0.8486210000  | 0.7503100000  |
| S | -0.5462940000 | -1.8836820000 | -0.4272620000 |
| C | -2.0797850000 | -1.0006310000 | -0.1984560000 |
| C | -2.4915730000 | -0.0654750000 | -1.1461410000 |
| C | -2.8657580000 | -1.2476960000 | 0.9262110000  |
| C | -3.6828050000 | 0.6285450000  | -0.9630240000 |
| H | -1.8716570000 | 0.1227710000  | -2.0144490000 |
| C | -4.0563440000 | -0.5531010000 | 1.1038600000  |
| H | -2.5342320000 | -1.9777370000 | 1.6547080000  |
| C | -4.4642530000 | 0.3857660000  | 0.1610050000  |
| H | -3.9933550000 | 1.3640210000  | -1.6948110000 |
| H | -4.6655730000 | -0.7447840000 | 1.9790040000  |
| H | -5.3904870000 | 0.9291560000  | 0.3037930000  |
| O | 2.1325840000  | -2.4291450000 | -0.1524660000 |
| C | 3.4557970000  | -2.9086220000 | -0.2620130000 |
| H | 3.9343080000  | -2.9653680000 | 0.7204510000  |
| H | 3.3794340000  | -3.9045980000 | -0.6910910000 |
| H | 4.0541260000  | -2.2748700000 | -0.9237250000 |
| C | 1.3681710000  | 1.6212800000  | -0.7629450000 |
| H | 3.4722010000  | 1.7673680000  | -0.3702160000 |
| H | 0.6578830000  | 1.2535220000  | -1.4942770000 |
| C | 2.6774600000  | 1.1547210000  | -0.7807680000 |

|   |               |              |               |
|---|---------------|--------------|---------------|
| H | 2.9825110000  | 0.4953170000 | -1.5833410000 |
| C | 0.9773810000  | 2.9080190000 | -0.1516960000 |
| O | -0.0946220000 | 3.4198460000 | -0.3910490000 |
| C | 1.9571330000  | 3.5756350000 | 0.8000750000  |
| H | 1.4298210000  | 4.3521980000 | 1.3499670000  |
| H | 2.4052410000  | 2.8625640000 | 1.4969590000  |
| H | 2.7700110000  | 4.0334650000 | 0.2305090000  |

**Cartesian Coordinates of all the Stationary Points as Computed at the IEFPCM(diethylether)/M06-2X-D3/6-311+G(d,p) level**

**1**

0 1

|   |               |               |               |
|---|---------------|---------------|---------------|
| C | -3.6413880000 | -0.4882600000 | 0.4391270000  |
| H | -3.8169210000 | -1.4966870000 | 0.7838800000  |
| H | -4.4943750000 | 0.1631200000  | 0.3129790000  |
| C | -2.3882950000 | -0.1038220000 | 0.1762130000  |
| C | -1.2212340000 | -0.9966650000 | 0.3883030000  |
| C | -1.0340620000 | -1.6685930000 | 1.5207390000  |
| H | -1.7074080000 | -1.5295000000 | 2.3593530000  |
| H | -0.1993710000 | -2.3488980000 | 1.6383980000  |
| S | -0.0703990000 | -1.1612560000 | -0.9812290000 |
| C | 1.3677120000  | -0.3076870000 | -0.3519820000 |
| C | 2.6232710000  | -0.8382390000 | -0.6424240000 |
| C | 1.2602960000  | 0.8867770000  | 0.3615750000  |
| C | 3.7706750000  | -0.1712620000 | -0.2225400000 |
| H | 2.7016740000  | -1.7721130000 | -1.1866300000 |
| C | 2.4109990000  | 1.5327880000  | 0.7951950000  |
| H | 0.2807470000  | 1.3017160000  | 0.5668460000  |
| C | 3.6687690000  | 1.0106090000  | 0.5019340000  |
| H | 4.7442200000  | -0.5882470000 | -0.4513330000 |
| H | 2.3240260000  | 2.4565570000  | 1.3550100000  |
| H | 4.5624190000  | 1.5226450000  | 0.8372230000  |
| O | -2.0079090000 | 1.1032570000  | -0.3047820000 |
| C | -3.0391300000 | 2.0207810000  | -0.6239730000 |
| H | -3.6035900000 | 2.2982840000  | 0.2707030000  |
| H | -2.5487960000 | 2.8984140000  | -1.0368240000 |
| H | -3.7186520000 | 1.5901850000  | -1.3646890000 |

**2**

0 1

|   |               |               |               |
|---|---------------|---------------|---------------|
| C | 1.9227380000  | 0.1672070000  | 0.0000000000  |
| H | 1.8147900000  | 1.2463420000  | 0.0000000000  |
| H | 2.9335540000  | -0.2226420000 | 0.0001260000  |
| C | 0.8708970000  | -0.6462280000 | 0.0000000000  |
| H | 0.9888940000  | -1.7250650000 | 0.0000000000  |
| C | -0.5462830000 | -0.1873950000 | -0.0001070000 |
| O | -1.4381650000 | -1.0073910000 | 0.0000000000  |
| C | -0.8347030000 | 1.2959820000  | 0.0000000000  |

|   |               |              |               |
|---|---------------|--------------|---------------|
| H | -0.3978360000 | 1.7695260000 | 0.8818040000  |
| H | -0.3978570000 | 1.7696400000 | -0.8817600000 |
| H | -1.9121200000 | 1.4439300000 | 0.0000000000  |

**CA-on**

0 1

|   |               |               |               |
|---|---------------|---------------|---------------|
| C | -2.2232510000 | 0.4191040000  | 1.2337650000  |
| H | -1.8193810000 | 0.3958530000  | 2.2506490000  |
| H | -3.0834420000 | 1.0926790000  | 1.2479780000  |
| C | -1.1767190000 | 0.9314470000  | 0.2786690000  |
| C | -0.1458760000 | 0.1374050000  | -0.0247070000 |
| C | -0.1266170000 | -1.2388810000 | 0.5939200000  |
| H | 0.0936460000  | -1.1653680000 | 1.6648530000  |
| H | 0.6594090000  | -1.8501790000 | 0.1489370000  |
| S | 1.0308680000  | 0.6091110000  | -1.2617170000 |
| C | 2.5460560000  | 0.0845150000  | -0.4795980000 |
| C | 3.5356760000  | -0.5053990000 | -1.2644690000 |
| C | 2.7719780000  | 0.2978340000  | 0.8808970000  |
| C | 4.7485090000  | -0.8730520000 | -0.6900820000 |
| H | 3.3524310000  | -0.6810280000 | -2.3180520000 |
| C | 3.9767960000  | -0.0932880000 | 1.4517590000  |
| H | 2.0041130000  | 0.7688050000  | 1.4848250000  |
| C | 4.9704290000  | -0.6748930000 | 0.6684360000  |
| H | 5.5148020000  | -1.3284720000 | -1.3059280000 |
| H | 4.1439450000  | 0.0679400000  | 2.5101480000  |
| H | 5.9108990000  | -0.9725650000 | 1.1155990000  |
| O | -1.3702660000 | 2.1412170000  | -0.3270050000 |
| C | -1.3131080000 | 3.2468600000  | 0.5704770000  |
| H | -0.3159880000 | 3.3202200000  | 1.0136850000  |
| H | -1.5209330000 | 4.1378380000  | -0.0173460000 |
| H | -2.0602050000 | 3.1539160000  | 1.3639130000  |
| C | -1.4962730000 | -1.9105220000 | 0.3927840000  |
| H | -1.5240880000 | -2.8657850000 | 0.9186070000  |
| H | -1.6005210000 | -2.1362870000 | -0.6720860000 |
| C | -2.6755580000 | -1.0211780000 | 0.8714290000  |
| H | -3.1345540000 | -1.4675340000 | 1.7543570000  |
| C | -3.7692800000 | -1.0042250000 | -0.1893630000 |
| O | -4.7892540000 | -1.6329190000 | -0.0304350000 |
| C | -3.5302160000 | -0.1876000000 | -1.4405760000 |
| H | -4.3524700000 | -0.3475630000 | -2.1346190000 |
| H | -3.4590060000 | 0.8739250000  | -1.1884060000 |
| H | -2.5816750000 | -0.4573120000 | -1.9101710000 |

**CA-ox**

0 1

|   |               |               |              |
|---|---------------|---------------|--------------|
| C | -2.2544230000 | 0.4328490000  | 0.6450090000 |
| H | -2.0202180000 | -0.2519180000 | 1.4694120000 |
| H | -3.0550580000 | 1.0829020000  | 0.9942530000 |

|   |               |               |               |
|---|---------------|---------------|---------------|
| C | -1.0006550000 | 1.2007510000  | 0.3064600000  |
| C | -0.0130730000 | 0.5331080000  | -0.3062090000 |
| C | -0.2509500000 | -0.9213800000 | -0.6315110000 |
| H | -0.2347540000 | -1.5235690000 | 0.2855570000  |
| H | 0.5484020000  | -1.3015370000 | -1.2687820000 |
| S | 1.4621620000  | 1.3501240000  | -0.8433990000 |
| C | 2.7053060000  | 0.2425370000  | -0.2039710000 |
| C | 3.8607860000  | 0.0333820000  | -0.9565680000 |
| C | 2.5643490000  | -0.3782610000 | 1.0378270000  |
| C | 4.8717180000  | -0.7853070000 | -0.4638430000 |
| H | 3.9630960000  | 0.5060220000  | -1.9265760000 |
| C | 3.5691790000  | -1.2124420000 | 1.5129390000  |
| H | 1.6711760000  | -0.2016800000 | 1.6266640000  |
| C | 4.7275120000  | -1.4158440000 | 0.7675240000  |
| H | 5.7677570000  | -0.9402850000 | -1.0530270000 |
| H | 3.4507940000  | -1.6959870000 | 2.4754820000  |
| H | 5.5109750000  | -2.0619570000 | 1.1440490000  |
| O | -0.8543860000 | 2.4990440000  | 0.6723690000  |
| C | -2.0121080000 | 3.3250500000  | 0.6794490000  |
| H | -2.6343340000 | 3.1383790000  | 1.5577030000  |
| H | -1.6466810000 | 4.3486790000  | 0.7165650000  |
| H | -2.6028030000 | 3.1854320000  | -0.2298440000 |
| C | -1.6083830000 | -1.0759130000 | -1.3376750000 |
| H | -1.8230660000 | -2.1353610000 | -1.4958700000 |
| H | -1.5253760000 | -0.6219630000 | -2.3263980000 |
| C | -2.7623960000 | -0.3827820000 | -0.5749240000 |
| H | -3.2838140000 | 0.3106810000  | -1.2364390000 |
| C | -3.8273610000 | -1.3310820000 | -0.0458640000 |
| O | -4.9956810000 | -1.0256260000 | -0.0764870000 |
| C | -3.3772510000 | -2.6446940000 | 0.5587060000  |
| H | -3.3932370000 | -3.4103060000 | -0.2221190000 |
| H | -2.3620770000 | -2.5968210000 | 0.9550980000  |
| H | -4.0783300000 | -2.9398760000 | 1.3375040000  |

### CA-mn

0 1

|   |               |               |               |
|---|---------------|---------------|---------------|
| C | -2.2147730000 | 1.3009680000  | 1.2529070000  |
| H | -1.7493670000 | 1.2558470000  | 2.2442520000  |
| H | -2.9217300000 | 2.1294740000  | 1.2706710000  |
| C | -1.1422340000 | 1.5042740000  | 0.2108250000  |
| C | -0.3438450000 | 0.4638650000  | -0.0663670000 |
| C | -0.5121700000 | -0.7975470000 | 0.7443950000  |
| H | -0.0998280000 | -0.6412950000 | 1.7474700000  |
| H | 0.0551530000  | -1.6074520000 | 0.2859730000  |
| S | 0.8759780000  | 0.5435690000  | -1.3467460000 |
| C | 2.3362240000  | 0.0687800000  | -0.4387270000 |
| C | 3.2885880000  | -0.7271160000 | -1.0750040000 |
| C | 2.5617050000  | 0.5089390000  | 0.8663880000  |
| C | 4.4622550000  | -1.0708610000 | -0.4118540000 |

|   |               |               |               |
|---|---------------|---------------|---------------|
| H | 3.1050540000  | -1.0809680000 | -2.0828420000 |
| C | 3.7264050000  | 0.1430390000  | 1.5301640000  |
| H | 1.8251670000  | 1.1388150000  | 1.3530420000  |
| C | 4.6829160000  | -0.6434300000 | 0.8932570000  |
| H | 5.1982620000  | -1.6873410000 | -0.9142570000 |
| H | 3.8921490000  | 0.4843060000  | 2.5453080000  |
| H | 5.5922910000  | -0.9218500000 | 1.4116120000  |
| O | -0.9657370000 | 2.7104700000  | -0.3873040000 |
| C | -2.1254820000 | 3.4748930000  | -0.6902860000 |
| H | -2.5217310000 | 3.9759900000  | 0.1960220000  |
| H | -1.8082840000 | 4.2276280000  | -1.4085260000 |
| H | -2.9019690000 | 2.8514010000  | -1.1418580000 |
| C | -2.9592300000 | -0.0104040000 | 0.9673010000  |
| H | -3.4825590000 | 0.1112470000  | 0.0137380000  |
| H | -3.7202890000 | -0.1847390000 | 1.7295760000  |
| C | -1.9868100000 | -1.2206910000 | 0.8864660000  |
| H | -2.0945100000 | -1.8093220000 | 1.8033540000  |
| C | -2.4241790000 | -2.1121480000 | -0.2692270000 |
| O | -1.7563040000 | -2.2498020000 | -1.2647800000 |
| C | -3.7494930000 | -2.8191420000 | -0.0962250000 |
| H | -3.6339490000 | -3.5911940000 | 0.6698980000  |
| H | -4.5230530000 | -2.1314840000 | 0.2512010000  |
| H | -4.0493930000 | -3.2820220000 | -1.0340920000 |

### CA-mx

0 1

|   |               |               |               |
|---|---------------|---------------|---------------|
| C | -2.5259460000 | 1.0803200000  | 0.6420360000  |
| H | -2.3373790000 | 0.6564590000  | 1.6346160000  |
| H | -3.2579080000 | 1.8770300000  | 0.7686260000  |
| C | -1.2375350000 | 1.6057490000  | 0.0594480000  |
| C | -0.3291860000 | 0.7086060000  | -0.3489670000 |
| C | -0.6524610000 | -0.7528990000 | -0.1658690000 |
| H | -0.5915690000 | -1.0118900000 | 0.8989340000  |
| H | 0.0773930000  | -1.3777470000 | -0.6821600000 |
| S | 1.1371170000  | 1.2066010000  | -1.2050070000 |
| C | 2.3672150000  | 0.2540130000  | -0.3312810000 |
| C | 3.4378330000  | -0.2725480000 | -1.0532380000 |
| C | 2.3018710000  | 0.0656060000  | 1.0497890000  |
| C | 4.4404050000  | -0.9765310000 | -0.3940730000 |
| H | 3.4795810000  | -0.1368920000 | -2.1277490000 |
| C | 3.2956580000  | -0.6580600000 | 1.6977520000  |
| H | 1.4745860000  | 0.4880360000  | 1.6092790000  |
| C | 4.3700840000  | -1.1774800000 | 0.9804490000  |
| H | 5.2701360000  | -1.3809620000 | -0.9615090000 |
| H | 3.2354320000  | -0.8067790000 | 2.7694590000  |
| H | 5.1453140000  | -1.7365810000 | 1.4898420000  |
| O | -1.0523320000 | 2.9332030000  | -0.1546230000 |
| C | -1.6345600000 | 3.8379550000  | 0.7762090000  |
| H | -1.4837850000 | 3.4990770000  | 1.8042430000  |

|   |               |               |               |
|---|---------------|---------------|---------------|
| H | -1.1221350000 | 4.7863460000  | 0.6319230000  |
| H | -2.7007800000 | 3.9783300000  | 0.5854170000  |
| C | -3.1074720000 | -0.0038050000 | -0.2881810000 |
| H | -3.4681750000 | 0.4887090000  | -1.1922290000 |
| H | -3.9803810000 | -0.4528520000 | 0.1909050000  |
| C | -2.0754660000 | -1.0813800000 | -0.6945100000 |
| H | -2.0122750000 | -1.1449160000 | -1.7815060000 |
| C | -2.4192090000 | -2.4793130000 | -0.2089590000 |
| O | -2.2600620000 | -3.4425280000 | -0.9201950000 |
| C | -2.9298160000 | -2.6343280000 | 1.2100180000  |
| H | -2.6223460000 | -1.8137900000 | 1.8596870000  |
| H | -4.0230270000 | -2.6519130000 | 1.1854780000  |
| H | -2.5858810000 | -3.5861050000 | 1.6116630000  |

**TS-on**

0 1

|   |               |               |               |
|---|---------------|---------------|---------------|
| C | -2.3772600000 | 0.5121830000  | 1.5278990000  |
| H | -2.0580140000 | 0.0334040000  | 2.4379850000  |
| H | -3.4276990000 | 0.7609050000  | 1.4696980000  |
| C | -1.4515300000 | 1.0941840000  | 0.7017810000  |
| C | -0.1134720000 | 0.6176970000  | 0.6614810000  |
| C | 0.2548240000  | -0.4720570000 | 1.4334620000  |
| H | -0.1816000000 | -0.5786410000 | 2.4173920000  |
| H | 1.2607170000  | -0.8644330000 | 1.3487920000  |
| S | 0.8428320000  | 1.1985400000  | -0.7270960000 |
| C | 2.4228340000  | 0.4355590000  | -0.4011930000 |
| C | 2.7986000000  | -0.7047320000 | -1.1083220000 |
| C | 3.2877580000  | 0.9939540000  | 0.5403540000  |
| C | 4.0391760000  | -1.2896640000 | -0.8686850000 |
| H | 2.1203800000  | -1.1293960000 | -1.8390470000 |
| C | 4.5209020000  | 0.4006710000  | 0.7817730000  |
| H | 2.9867730000  | 1.8838880000  | 1.0802900000  |
| C | 4.8976880000  | -0.7403410000 | 0.0772330000  |
| H | 4.3308780000  | -2.1753710000 | -1.4199190000 |
| H | 5.1909130000  | 0.8328260000  | 1.5151340000  |
| H | 5.8614890000  | -1.1980750000 | 0.2644380000  |
| O | -1.7639360000 | 1.9546880000  | -0.3077830000 |
| C | -3.1260620000 | 2.3151450000  | -0.4622500000 |
| H | -3.5024900000 | 2.8120180000  | 0.4363700000  |
| H | -3.1617000000 | 3.0017440000  | -1.3039880000 |
| H | -3.7400420000 | 1.4348230000  | -0.6782320000 |
| C | -0.8612980000 | -2.0338610000 | 0.6776550000  |
| H | -0.4235620000 | -2.7274420000 | 1.3865400000  |
| H | -0.3898850000 | -2.0299220000 | -0.2992300000 |
| C | -2.2239650000 | -1.7745410000 | 0.7791320000  |
| H | -2.7738520000 | -2.1114770000 | 1.6511620000  |
| C | -3.0758280000 | -1.4086590000 | -0.3643060000 |
| O | -4.2925590000 | -1.4357460000 | -0.2843710000 |
| C | -2.3975520000 | -1.0208520000 | -1.6633020000 |

|   |               |               |               |
|---|---------------|---------------|---------------|
| H | -3.1376530000 | -0.5828450000 | -2.3309140000 |
| H | -1.5737860000 | -0.3221880000 | -1.5061950000 |
| H | -1.9831200000 | -1.9161060000 | -2.1357910000 |

**TS-ox**

0 1

|   |               |               |               |
|---|---------------|---------------|---------------|
| C | -2.4149460000 | 0.7243870000  | 0.8811120000  |
| H | -2.3653540000 | -0.1075910000 | 1.5645160000  |
| H | -3.3840950000 | 1.1928580000  | 0.7806330000  |
| C | -1.2631040000 | 1.3580460000  | 0.4977170000  |
| C | -0.0266620000 | 0.6578310000  | 0.4545980000  |
| C | 0.0156870000  | -0.6911150000 | 0.7633150000  |
| H | -0.6284570000 | -1.0596340000 | 1.5511840000  |
| H | 0.9521410000  | -1.2269610000 | 0.6684610000  |
| S | 1.2555140000  | 1.4807710000  | -0.4657200000 |
| C | 2.6307020000  | 0.3728730000  | -0.2073020000 |
| C | 3.0307080000  | -0.4849620000 | -1.2295350000 |
| C | 3.3206940000  | 0.3884380000  | 1.0053460000  |
| C | 4.1199880000  | -1.3308050000 | -1.0362520000 |
| H | 2.4891610000  | -0.4890330000 | -2.1680460000 |
| C | 4.4001810000  | -0.4650730000 | 1.1962360000  |
| H | 3.0040040000  | 1.0644580000  | 1.7907470000  |
| C | 4.8015040000  | -1.3239930000 | 0.1755030000  |
| H | 4.4311230000  | -1.9960380000 | -1.8325580000 |
| H | 4.9334130000  | -0.4546110000 | 2.1391730000  |
| H | 5.6467700000  | -1.9846990000 | 0.3254480000  |
| O | -1.2300400000 | 2.5754440000  | -0.1094920000 |
| C | -2.4386790000 | 3.3112270000  | -0.1749940000 |
| H | -2.8587820000 | 3.4583310000  | 0.8240190000  |
| H | -2.1824040000 | 4.2728460000  | -0.6119490000 |
| H | -3.1718520000 | 2.8055950000  | -0.8093960000 |
| C | -1.1078880000 | -1.5691700000 | -0.7270440000 |
| H | -0.9937750000 | -2.5574280000 | -0.2940760000 |
| H | -0.3974220000 | -1.3356940000 | -1.5118170000 |
| C | -2.3790630000 | -1.0097450000 | -0.8052720000 |
| H | -2.5960410000 | -0.2550610000 | -1.5516940000 |
| C | -3.5732950000 | -1.6220400000 | -0.2049240000 |
| O | -4.6944610000 | -1.2523680000 | -0.5047120000 |
| C | -3.3780150000 | -2.7379630000 | 0.8051580000  |
| H | -4.3161390000 | -2.9023060000 | 1.3311170000  |
| H | -3.0967100000 | -3.6577780000 | 0.2858350000  |
| H | -2.5846720000 | -2.5118310000 | 1.5215780000  |

**TS-mn**

0 1

|   |              |               |              |
|---|--------------|---------------|--------------|
| C | 2.9060850000 | -0.4266630000 | 1.3586950000 |
| H | 2.5780130000 | -0.2018000000 | 2.3617430000 |
| H | 3.9618880000 | -0.6469650000 | 1.2731060000 |

|   |               |               |               |
|---|---------------|---------------|---------------|
| C | 2.0040020000  | -1.0403420000 | 0.5034970000  |
| C | 0.6218470000  | -0.7193860000 | 0.5522240000  |
| C | 0.1768840000  | 0.2248010000  | 1.4403540000  |
| H | 0.6859070000  | 0.3655940000  | 2.3816930000  |
| H | -0.8377810000 | 0.6001460000  | 1.3945810000  |
| S | -0.3558090000 | -1.3293240000 | -0.8216600000 |
| C | -1.9873600000 | -0.7864720000 | -0.3412240000 |
| C | -2.4611550000 | 0.4539660000  | -0.7660390000 |
| C | -2.7892700000 | -1.6126820000 | 0.4459020000  |
| C | -3.7376480000 | 0.8672650000  | -0.3962860000 |
| H | -1.8249820000 | 1.1043910000  | -1.3540870000 |
| C | -4.0646720000 | -1.1950820000 | 0.8093760000  |
| H | -2.4088190000 | -2.5739370000 | 0.7699150000  |
| C | -4.5391190000 | 0.0443000000  | 0.3882860000  |
| H | -4.1007610000 | 1.8352920000  | -0.7194980000 |
| H | -4.6874380000 | -1.8374570000 | 1.4202800000  |
| H | -5.5326970000 | 0.3685920000  | 0.6736540000  |
| O | 2.3681440000  | -1.7413360000 | -0.6007130000 |
| C | 3.7310850000  | -2.1041580000 | -0.7468550000 |
| H | 4.0795420000  | -2.6633530000 | 0.1254200000  |
| H | 3.7800240000  | -2.7329250000 | -1.6318750000 |
| H | 4.3583540000  | -1.2208510000 | -0.8933360000 |
| C | 2.8076340000  | 1.6251480000  | 0.8654530000  |
| H | 3.3280780000  | 1.5041830000  | -0.0765440000 |
| H | 3.4455200000  | 1.8918420000  | 1.6997360000  |
| C | 1.4927910000  | 2.0802800000  | 0.8686400000  |
| H | 1.0986580000  | 2.5967460000  | 1.7364680000  |
| C | 0.7252320000  | 2.2940460000  | -0.3697480000 |
| O | -0.3170370000 | 2.9268920000  | -0.3746560000 |
| C | 1.2897760000  | 1.7264450000  | -1.6572710000 |
| H | 1.7145130000  | 0.7305740000  | -1.5198930000 |
| H | 0.5026390000  | 1.6896460000  | -2.4082830000 |
| H | 2.0867530000  | 2.3862160000  | -2.0135950000 |

### TS-mx

0 1

|   |               |               |               |
|---|---------------|---------------|---------------|
| C | -2.9266710000 | -0.3912900000 | -0.7473570000 |
| H | -2.7638240000 | 0.3649790000  | -1.4996130000 |
| H | -3.9540570000 | -0.7177990000 | -0.6556310000 |
| C | -1.8937420000 | -1.2668440000 | -0.4597290000 |
| C | -0.5439300000 | -0.8259630000 | -0.4897790000 |
| C | -0.2501850000 | 0.4526630000  | -0.8788340000 |
| H | -0.8787170000 | 0.9502560000  | -1.6044720000 |
| H | 0.7445110000  | 0.8636130000  | -0.7630770000 |
| S | 0.5985830000  | -1.8675870000 | 0.4153420000  |
| C | 2.1185630000  | -0.9603740000 | 0.1904320000  |
| C | 2.5320320000  | -0.0500050000 | 1.1616110000  |
| C | 2.8925310000  | -1.1666590000 | -0.9511870000 |
| C | 3.7168800000  | 0.6583450000  | 0.9863940000  |

|   |               |               |               |
|---|---------------|---------------|---------------|
| H | 1.9217940000  | 0.1065510000  | 2.0431160000  |
| C | 4.0746290000  | -0.4552240000 | -1.1221090000 |
| H | 2.5611970000  | -1.8772550000 | -1.6989180000 |
| C | 4.4867010000  | 0.4572460000  | -0.1544850000 |
| H | 4.0330520000  | 1.3701380000  | 1.7390480000  |
| H | 4.6744480000  | -0.6144750000 | -2.0100650000 |
| H | 5.4075340000  | 1.0114060000  | -0.2905350000 |
| O | -2.0721600000 | -2.4607650000 | 0.1560700000  |
| C | -3.3914380000 | -2.9660860000 | 0.2738710000  |
| H | -3.8683360000 | -3.0370690000 | -0.7072880000 |
| H | -3.2944520000 | -3.9571520000 | 0.7089960000  |
| H | -3.9957680000 | -2.3370500000 | 0.9326710000  |
| C | -1.4291130000 | 1.6034690000  | 0.7772100000  |
| H | -3.5345680000 | 1.6588260000  | 0.3715930000  |
| H | -0.7032050000 | 1.2564030000  | 1.5035850000  |
| C | -2.7163190000 | 1.0760200000  | 0.7796170000  |
| H | -2.9968600000 | 0.4018020000  | 1.5790860000  |
| C | -1.0898210000 | 2.8941650000  | 0.1592850000  |
| O | -0.0401880000 | 3.4593240000  | 0.4073250000  |
| C | -2.0844190000 | 3.5119980000  | -0.8068100000 |
| H | -1.5871910000 | 4.3043240000  | -1.3624260000 |
| H | -2.4982110000 | 2.7752670000  | -1.4994030000 |
| H | -2.9200750000 | 3.9413890000  | -0.2480890000 |
